# Supplementary material
Source: PubMed Central journal article supplement (PMC3343631)

**Supplementary Figure 1. Analysis of galectin colocalization with *S.Typhimurium*.**

A) Confocal microphotographs of HeLa cells expressing the indicated YFP-tagged galectins at 1h post infection with *S.Typhimurium*.

B) Colocalization of LAMP1 with galectin-8-positive bacteria in HeLa cells stably expressing YFP-tagged galectin-8, infected with *S.Typhimurium* and stained with LAMP1 antibody 1h after infection. Mean and s.d. of triplicate HeLa cultures, >200 bacteria were counted per coverslip.

C) Kinetic analysis of galectin recruitment in HeLa cells stably expressing the indicated YFP-tagged galectins and infected with *S.Typhimurium*. Percentage of YFP-positive bacteria were counted by microscopy at the indicated time points. Mean and s.d. of duplicate HeLa cultures. >100 bacteria counted per coverslip.

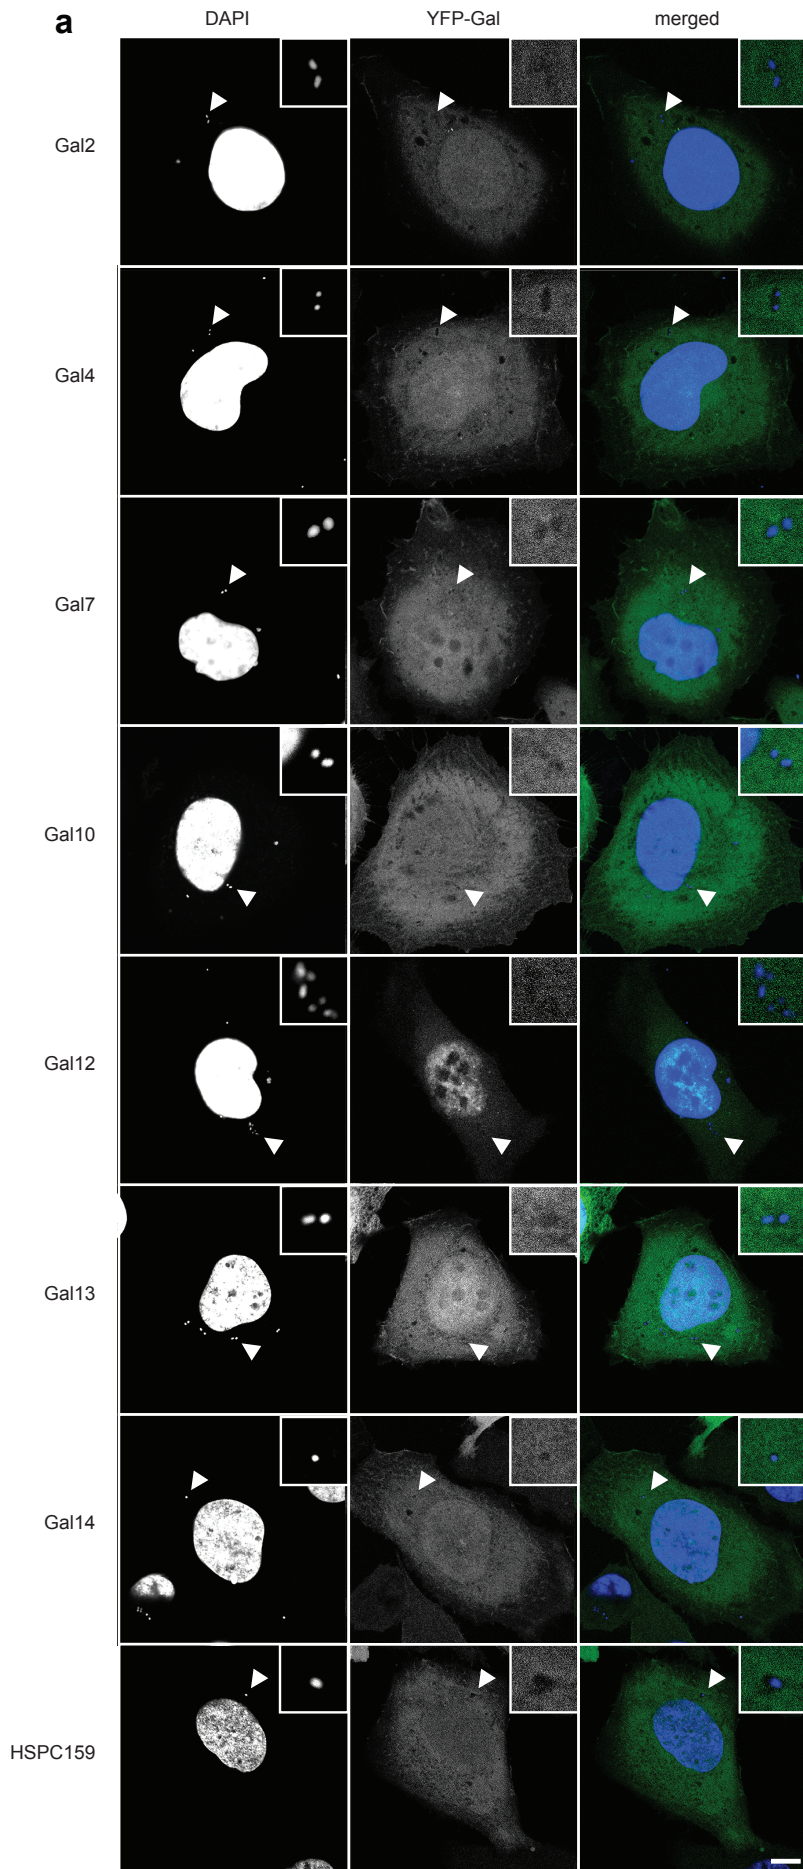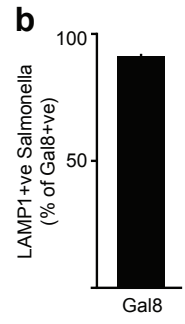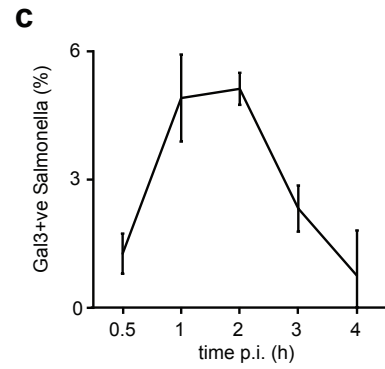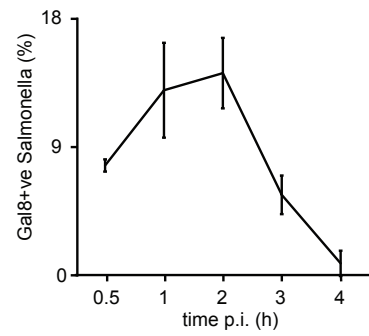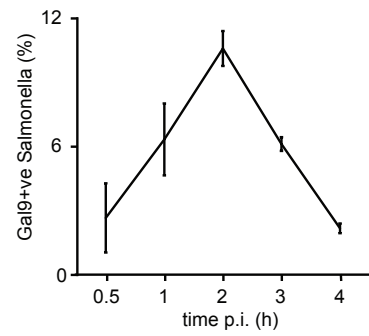

## **Supplementary Figure 2. Characterization of siRNAs**

Protein levels in HeLa cells after treatment with the indicated siRNAs for 3 days. Lysates of HeLa cells were probed with antibodies against (A) endogenous NDP52, (B) against GFP fused to the indicated galectins, (C) against endogenous galectin-8, and (D) against endogenous TBK1. Lower panels, loading controls.

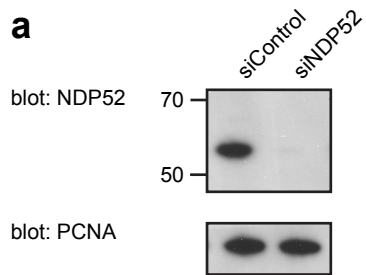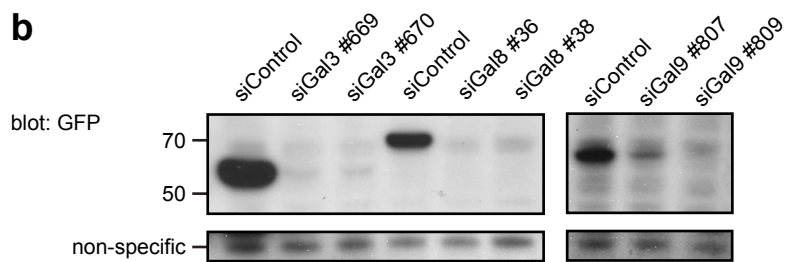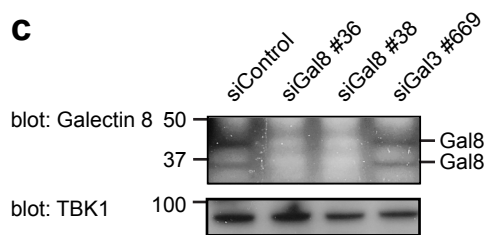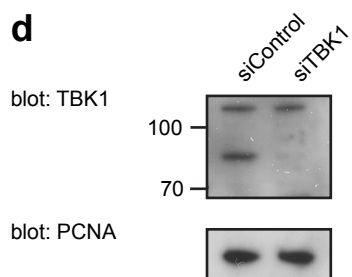



**Supplementary Figure 3. Galectin-8 depletion causes hyperproliferation of *S.Typhimurium* in a Lamp1-negative compartment.**

A) Lack of synergism between galectin-3 and galectin-9. Fold replication of *S.Typhimurium* in HeLa cells transfected with the indicated siRNAs. At the indicated time points after infection, cells were lysed and bacteria counted on the basis of their ability to form colonies on agar plates. Mean and s.d. of triplicate HeLa cultures and duplicate colony counts. siRNAs are further characterized in Supplementary Figure 2.

B-C) Hyperproliferation of *S.Typhimurium*, in a Lamp1-negative compartment, despite normal infectivity in cells depleted of galectin-8. HeLa cells transfected with the indicated siRNAs were infected with *S.Typhimurium*. B) At the indicated time points cells were scored according to the number of bacteria they contained. C) Cells were stained with an antibody against Lamp1. Lamp1-positive and negative bacteria were counted by microscopy at 6h post infection. Cells were scored according to the number of bacteria they contained.

Mean and s.d. of duplicated coverslips, >200 bacteria were counted per coverslip.

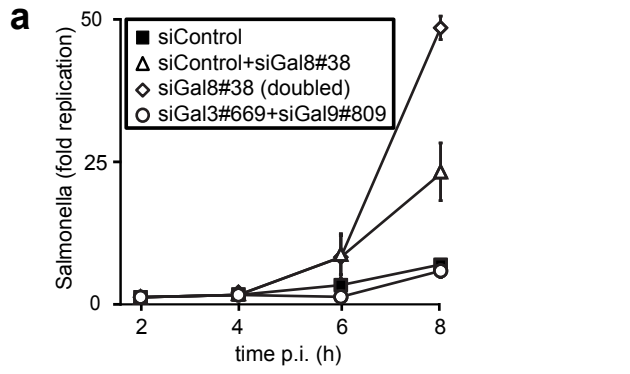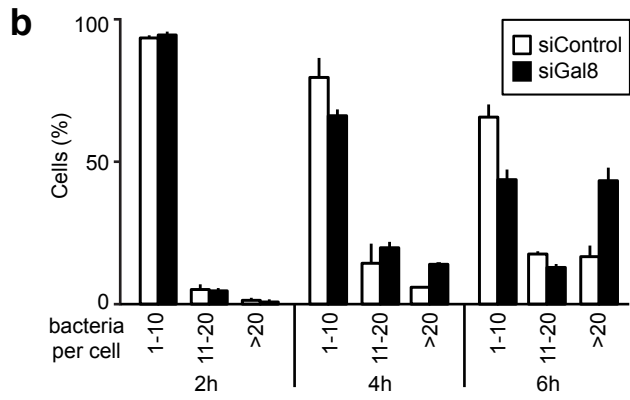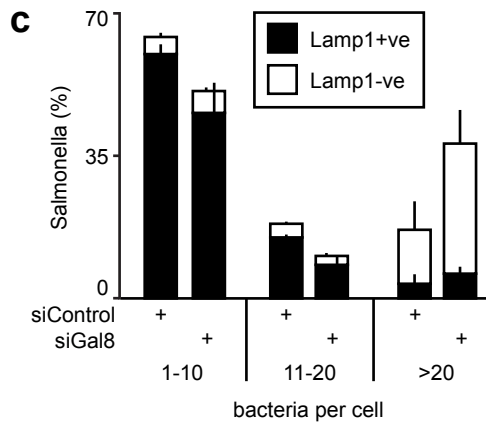

**Supplementary Figure 4. Characterization of proteins.**

A) Lysates of 293ET cells expressing the indicated Flag-tagged galectins, used in Fig.2a, were probed with anti-Flag antibody.

B) Lysates from HeLa cells expressing the indicated Flag-tagged galectin-3 variants, used in Fig.3g, were probed with anti-Flag antibody.

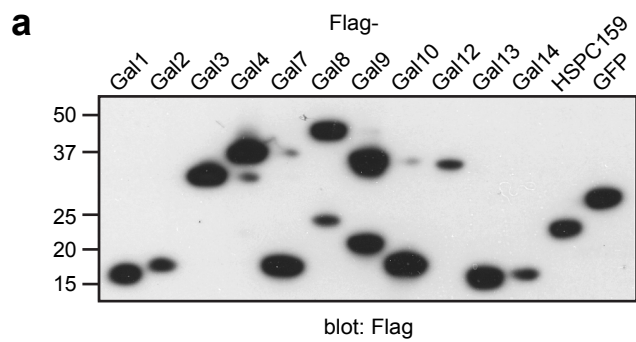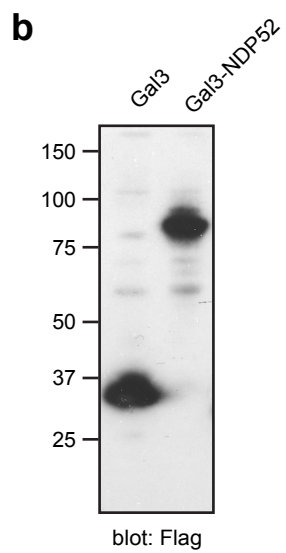

**Supplementary Figure 5. Galectin-8 and NDP52 form microdomains on bacteria distinct from p62 and ubiquitin.**

A) Galectins and NDP52 co-localize. Confocal micrographs of HeLa cells stably expressing YFP fused to the indicated galectins, infected with *S.Typhimurium* and stained with NDP52 antiserum 1h after infection.

B-C) Bacterial coats comprise distinct microdomains. Confocal micrographs of HeLa cells infected with *S.Typhimurium* and stained at 1h post infection with DAPI and antibodies against (B) galectin-8, p62, and NDP52 and (C) galectin-8, ubiquitin, and NDP52. White arrows in insets indicate the position of (B) p62 and (C) ubiquitin clusters.

Scale bar 10  $\mu$ m.

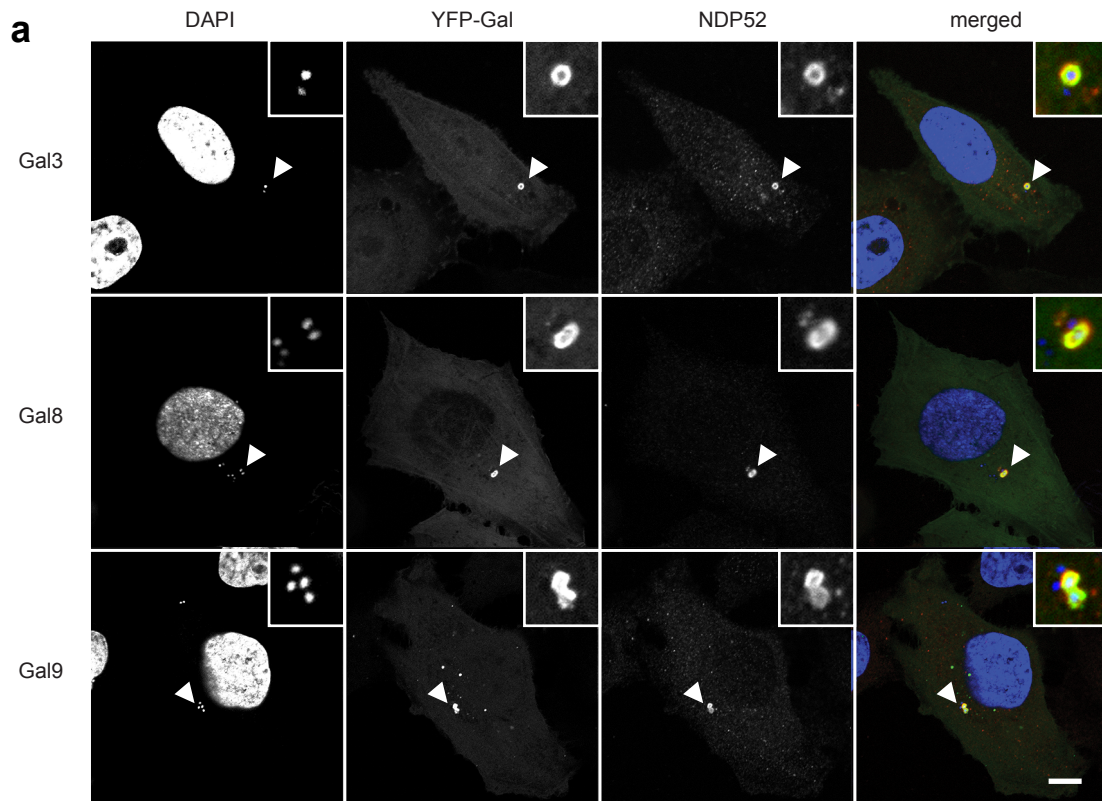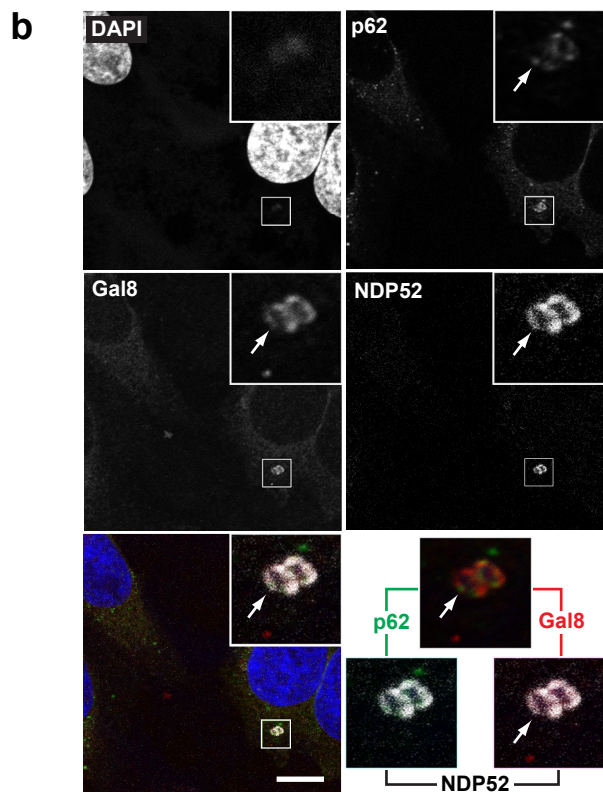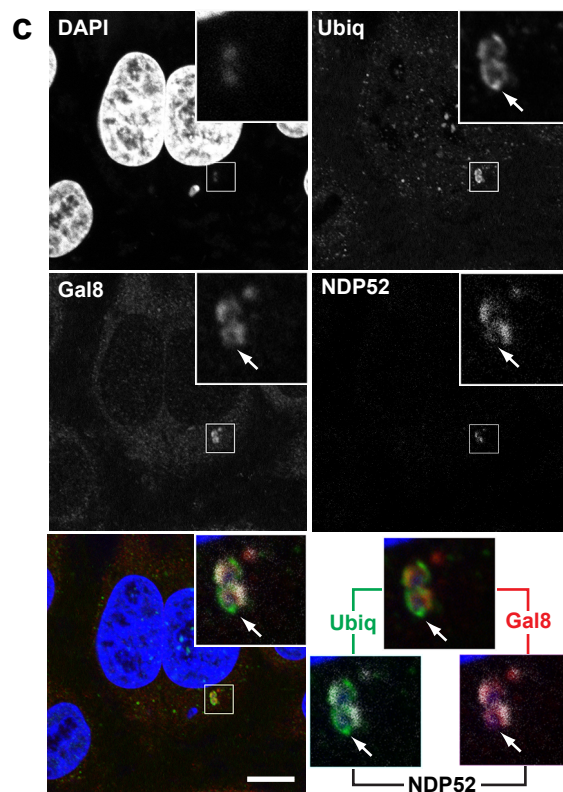

**Supplementary Figure 6. Defining the sites of interaction in NDP52 and galectin-8.**

A) Domain structure of galectin-8 and NDP52.

B-E) LUMIER binding assay: Normalized ratio between luciferase activity bound to beads and present in lysates.

B) Left panel: lysates from 293ET cells expressing the indicated Flag-tagged proteins and NDP52 fused to luciferase were incubated with anti-Flag beads. Right panel: lysates from 293ET cells expressing the indicated Flag-tagged proteins were probed with anti-Flag antibody.

C) Left panel: lysates from 293ET cells expressing Flag-tagged GFP or Gal8 and the indicated NDP52 variants fused to luciferase were incubated with anti-Flag beads. Right panel: lysates from 293ET cells expressing the indicated Flag-tagged proteins were probed with anti-Flag antibody.

D-E) Left panels: the indicated purified GST fusion proteins coupled to beads were incubated (D) with lysates of *E. coli* expressing galectin-8 fused to luciferase or (E) with lysates of 293ET cells expressing the indicated NDP52 variants fused to luciferase. Right panels: proteins purified from bacteria expressing the indicated proteins were stained with Coomassie Blue.

F) The indicated purified GST proteins bound to beads were incubated with purified NDP52 (input). Pulldown: proteins eluted from beads.

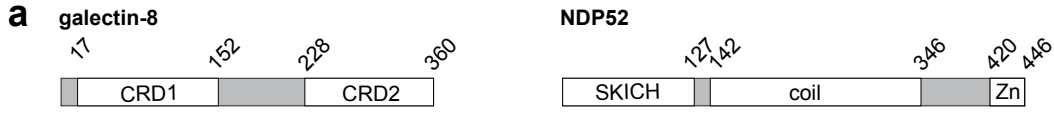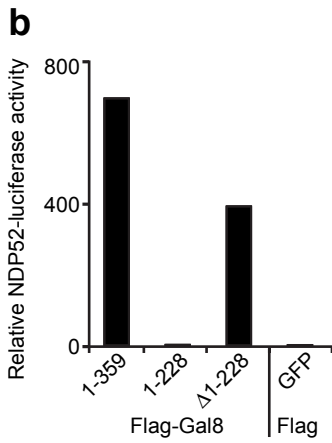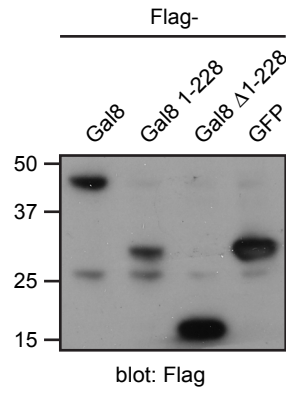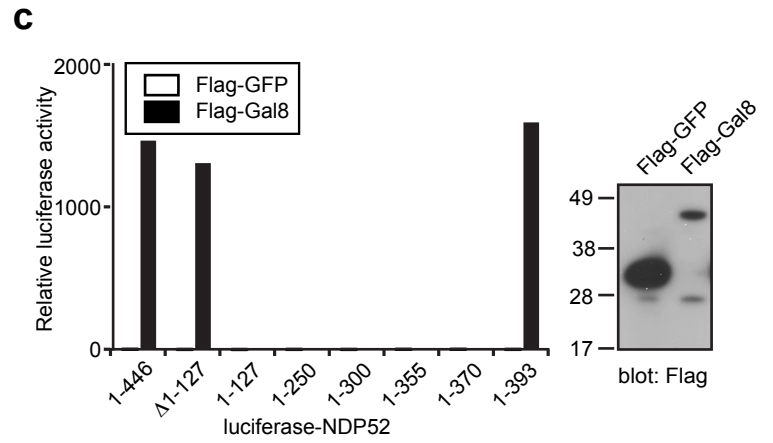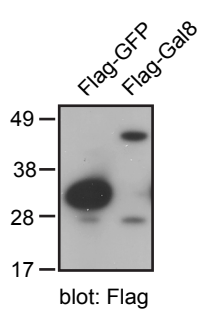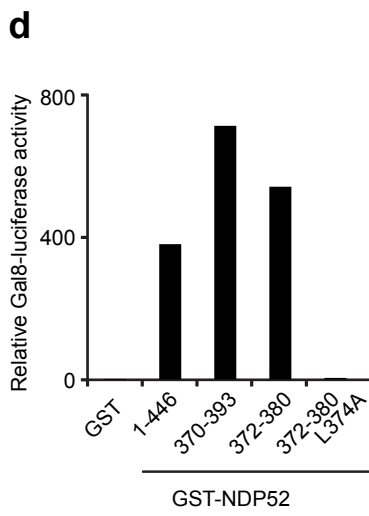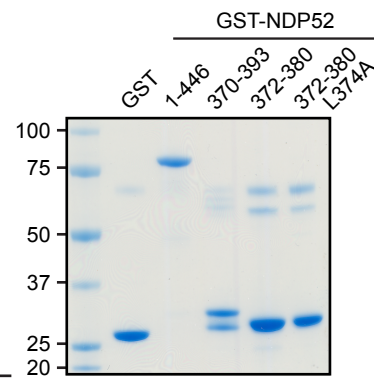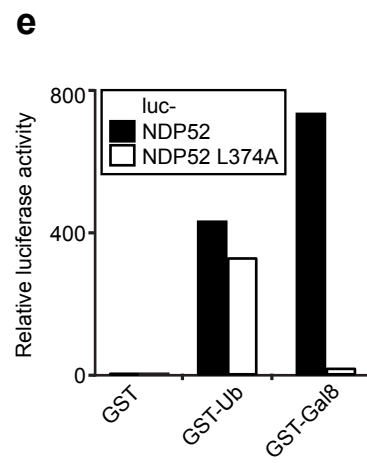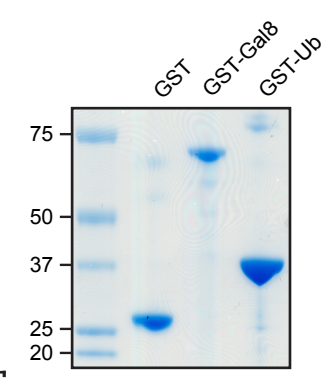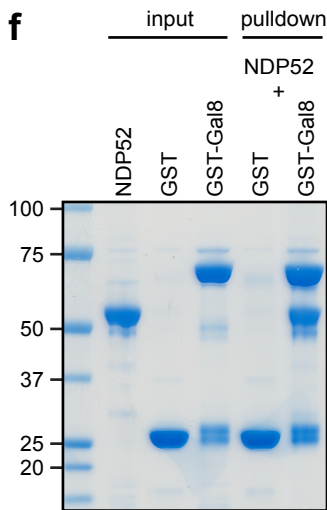



**Supplementary Figure 7. Complementation of galectin-8 knockdown restores NDP52 recruitment to *S.Typhimurium*.**

Left panel: Colocalization of NDP52, visualized by an antiserum, with *S.Typhimurium* at 1h p.i. in HeLa cells treated with the indicated siRNAs and stably expressing FLAG-tagged GFP or siRNA-resistant FLAG-tagged galectin-8. Right panel: lysates were probed with a FLAG antibody. Mean and s.d. of duplicated HeLa cultures, n>200 bacteria per coverslip.

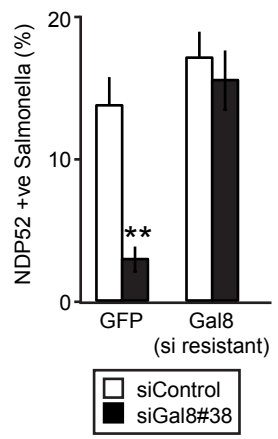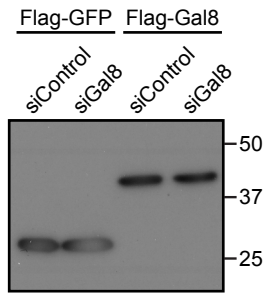

**Supplementary Figure 8. Galectins sense sterile damage to endosomes.**

Confocal images of HeLa cells expressing the indicated YFP-tagged galectins. Cells were left untreated or were exposed to hypertonic conditions, with or without PEG as indicated, followed by hypotonic shock. (This figure is an extended version of Fig. 3f. Identical images for Galectin 1 and 8 are therefore shown in both figures.)

Scale bar 10 $\mu$ m.

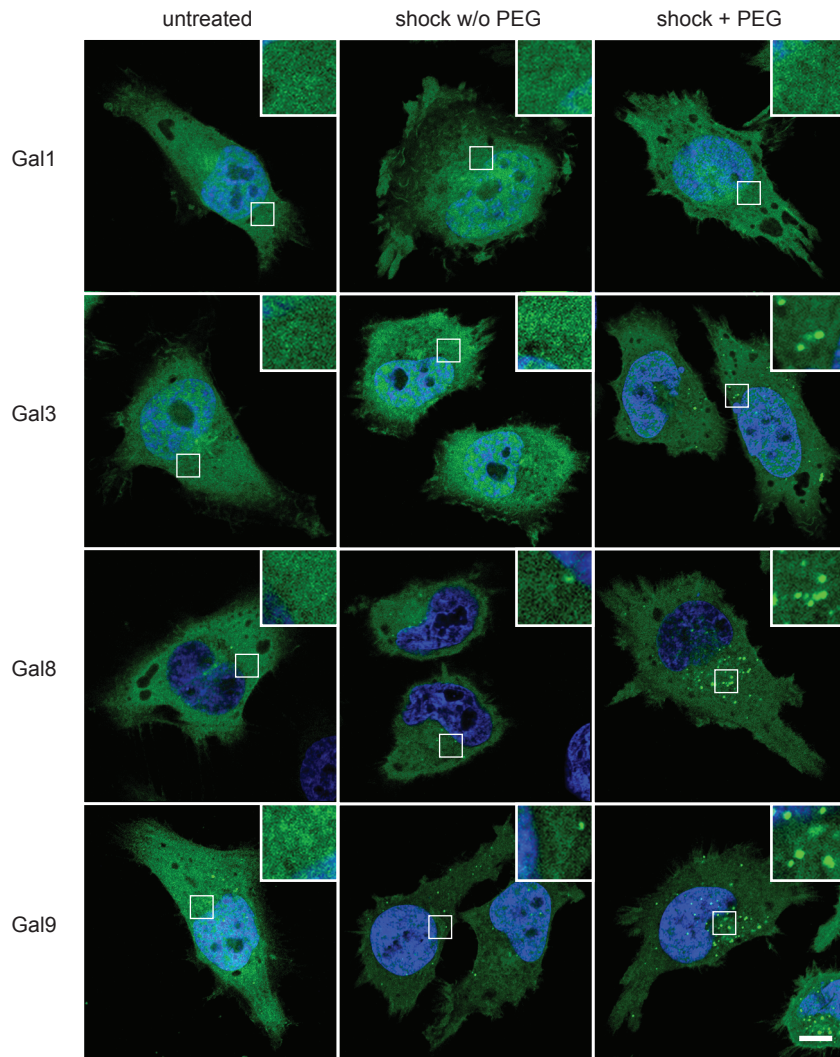

**Supplementary Figure 9. Galectins sense sterile damage to lysosomes.**

A-B) Maximum intensity reconstruction of confocal Z-stacks of HeLa cells expressing the indicated YFP-tagged galectins. Cells stained with LysoTracker Red and treated with 333 $\mu$ M GPN were imaged at the indicated time points.

Scale bar 10 $\mu$ m.

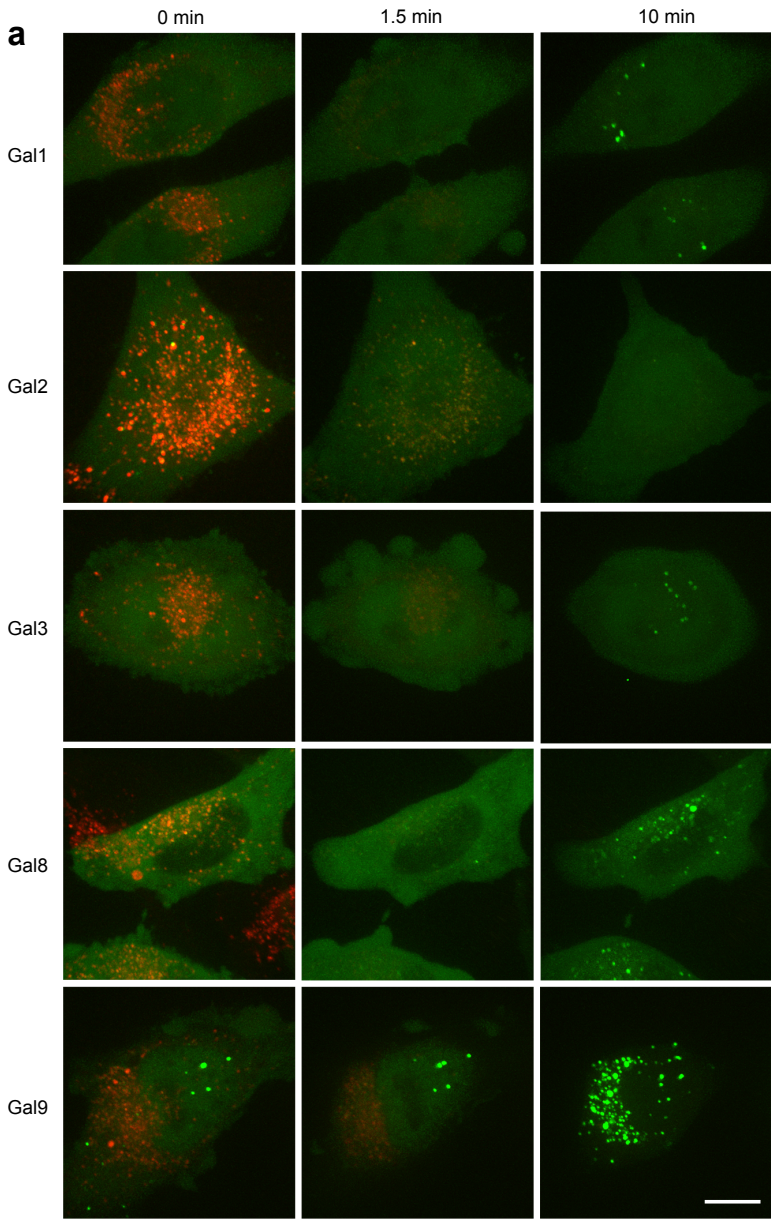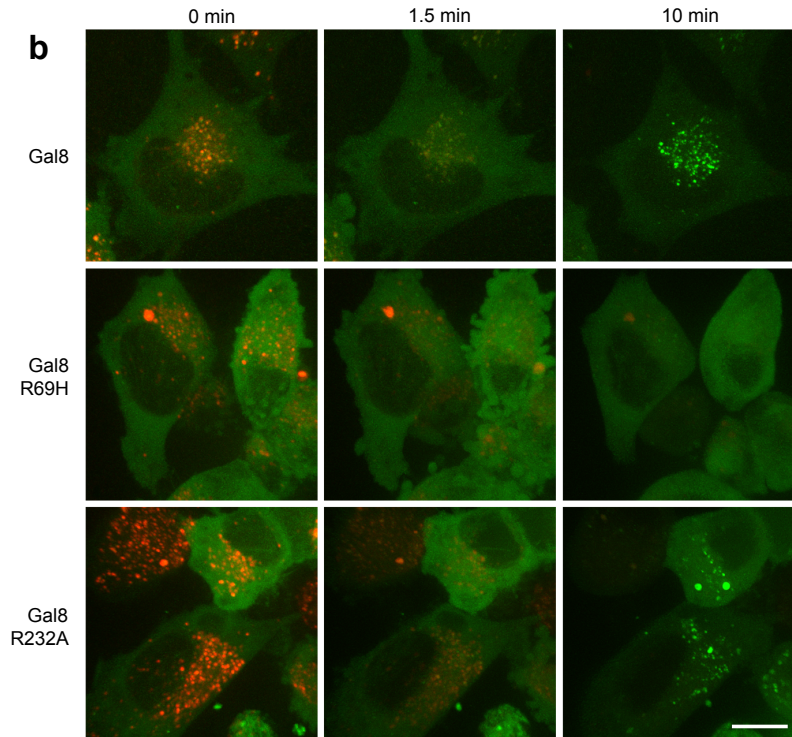

**Supplementary Figure 10. Galectins sense infection by *Listeria monocytogenes* and *Shigella flexneri*.**

A-D) Analysis of HeLa cells stably expressing YFP fused to the indicated galectins and infected with (A-B) *Listeria monocytogenes* or (C-D) *Shigella flexneri* for 1h. A, C) Percentage of bacteria coated by the indicated galectins. YFP-positive bacteria were counted by microscopy. Mean and s.d. of duplicate HeLa cultures, n>200 bacteria per coverslip. B, D) Confocal micrographs. Arrowheads, bacteria shown in insets.

Scale bar 10 $\mu$ m.

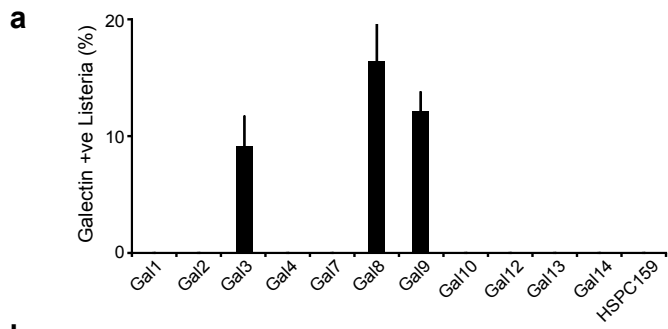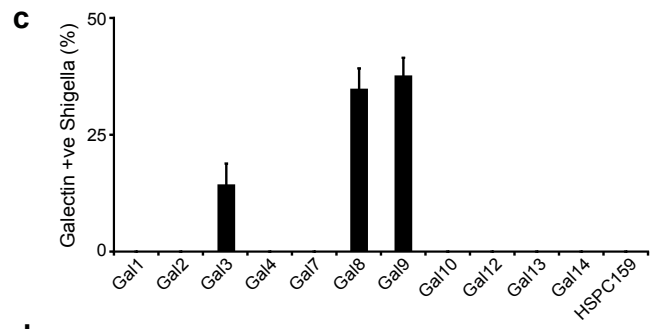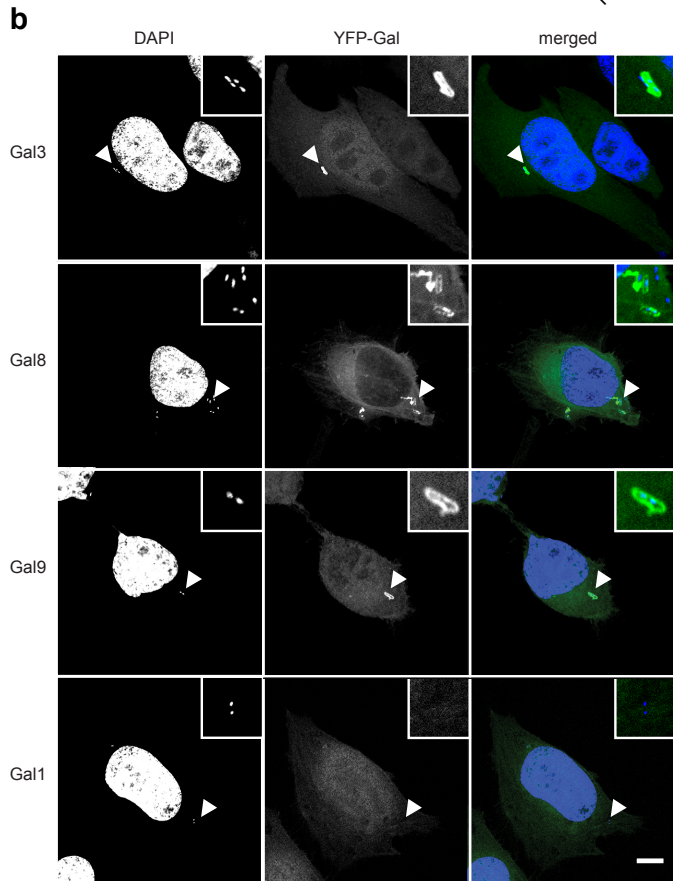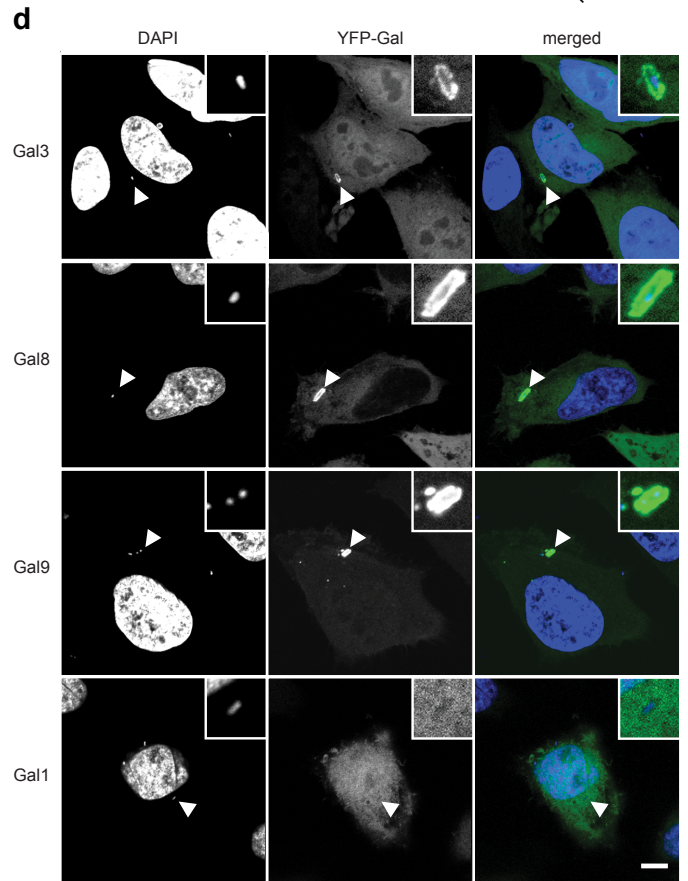



**Supplementary Figure 11. Impaired co-localization of NDP52 and LC3 in cells depleted of galectin-8.**

HeLa cells expressing GFP-LC3 were treated with the indicated siRNAs. Colocalization of NDP52, visualized by an antiserum, with GFP-LC3 on *S.Typhimurium* at 1h p.i. Mean and s.d. of duplicate HeLa culture, n>50 bacteria per coverslip

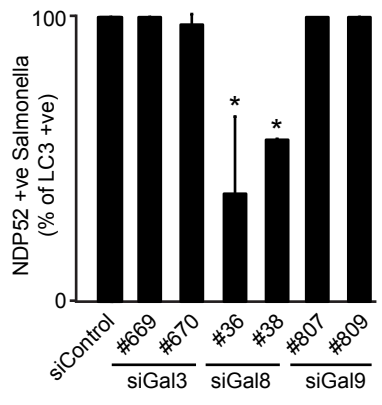

**Supplementary Figure 12. Autophagy is not required for the recruitment of galectin-8 to *S.Typhimurium*.**

Left panel: Analysis of galectin-8 recruitment to *S.Typhimurium* in ATG5-deficient (ATG5<sup>-/-</sup>) or complemented (ATG5<sup>+</sup>) MEFs expressing YFP-tagged galectin-8. YFP-positive bacteria were counted by microscopy. Mean and s.d. of triplicate cultures, n>200 bacteria per coverslip. Right panel: lysates were probed with an ATG5 antibody.

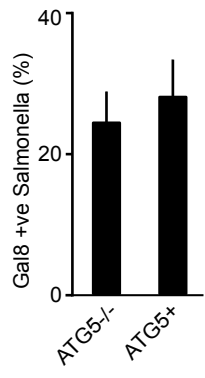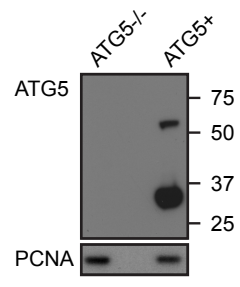

Supplement: NIHMS40155-supplement.pdf [file NIHMS40155-supplement.pdf]
